# Supplementary material for: Genomic and phenotypic comparison of two variants of multidrug-resistant Salmonella enterica serovar Heidelberg isolated during the 2015–2017 multi-state outbreak in cattle
Source: Front Microbiol. 2023 Oct 20;14:1282832. doi: 10.3389/fmicb.2023.1282832 (PMC10623430; doi:10.3389/fmicb.2023.1282832)
Supplement: Supplementary file 1 [file Table_1.XLSX]

## Sheet: Unique to SX 244 Genome
Table S1.Unique genetic features between Salmonella Heidelberg strains SX 244 and SX 245.
ID Information		Prokka Annotation			InterProScan Functional Predictions
SX244 Locus Tag	Genea	Product	Feature Type	Length (bp)	GO ID	GO Term	GO Ontology	Signature Descriptions	InterPro Annotation Descriptions
KODJJDOA_00745		site-specific integrase	CDS	1164	GO:0003677_GO:0006310_GO:0015074	DNA binding_DNA recombination_DNA integration	MF_BP_BP	INT_Rci_Hp1_C~Tyrosine recombinase domain profile.~Core-binding (CB) domain profile.~Phage integrase family~NA	Integrase-like, catalytic domain superfamily~Integrase, catalytic domain~DNA breaking-rejoining enzyme, catalytic core~Integrase/recombinase, N-terminal
KODJJDOA_00746		hypothetical protein	CDS	636
KODJJDOA_00747		Eag protein	CDS	180
KODJJDOA_00748		hypothetical protein	CDS	954				Protein of unknown function (DUF551)~Protein of unknown function (DUF550)	Domain of unknown function DUF551~Domain of unknown function DUF550
KODJJDOA_00749		hypothetical protein	CDS	195
KODJJDOA_00750		hypothetical protein	CDS	594				Ead/Ea22-like protein	Ead/Ea22-like protein
KODJJDOA_00751		hypothetical protein	CDS	360				Family of unknown function (DUF5448)	Protein of unknown function DUF5448
KODJJDOA_00752		hypothetical protein	CDS	138
KODJJDOA_00753		hypothetical protein	CDS	498
KODJJDOA_00754		hypothetical protein	CDS	171				Protein of unknown function (DUF2737)	Protein of unknown function DUF2737
KODJJDOA_00755		hypothetical protein	CDS	294				Protein of unknown function (DUF2856)	Bacteriophage P22, anti-RecBCD protein 2
KODJJDOA_00756		hypothetical protein	CDS	285					Winged helix-like DNA-binding domain superfamily
KODJJDOA_00757		ERF family protein	CDS	618				ERF superfamily~consensus disorder prediction~consensus disorder prediction	Essential recombination function protein~NA
KODJJDOA_00758		hypothetical protein	CDS	144				Accessory recombination function protein	Accessory recombination function protein
KODJJDOA_00759		hypothetical protein	CDS	189				Family of unknown function (DUF5444)	Kil protein, bacteriophage P22-type
KODJJDOA_00760		protease FtsH-inhibitory lysogeny factor CIII	CDS	159				Lambdoid phages regulatory protein CIII signature.~Lambda phage regulatory protein CIII signature~Lambda phage regulatory protein CIII signature~Lambda Phage CIII	Bacteriophage lambda, CIII, regulatory protein~Bacteriophage lambda, CIII, regulatory protein~Bacteriophage lambda, CIII, regulatory protein~Bacteriophage lambda, CIII, regulatory protein
KODJJDOA_00761		superinfection exclusion protein	CDS	312				Superinfection exclusion gene product 17	Superinfection exclusion gene product 17
KODJJDOA_00762		hypothetical protein	CDS	237
KODJJDOA_00763		hypothetical protein	CDS	195				Antirestriction protein Ral	Antirestriction protein Ral
KODJJDOA_00764		superinfection exclusion B family protein	CDS	579				Super-infection exclusion protein B	Superinfection exclusion protein B
KODJJDOA_00765		hypothetical protein	CDS	303
KODJJDOA_00766		LexA family transcriptional regulator	CDS	360				Peptidase S24-like~S24_LexA-like~NA	Peptidase S24/S26A/S26B/S26C~LexA-like~LexA/Signal peptidase-like superfamily~NA
KODJJDOA_00767		Cro/Cl family transcriptional regulator	CDS	186	GO:0003677	DNA binding	MF	DNA-binding transcriptional regulator Cro~NA	Lambda repressor-like, DNA-binding domain superfamily~Lambda repressor-like, DNA-binding domain superfamily
KODJJDOA_00768		lambda phage CII family protein	CDS	279	GO:0003677_GO:0006355	DNA binding_regulation of transcription, DNA-templated	MF_BP	Bacteriophage CII protein~HTH_XRE~NA	Transcription activator CII~Lambda repressor-like, DNA-binding domain superfamily~Cro/C1-type helix-turn-helix domain~Lambda repressor-like, DNA-binding domain superfamily
KODJJDOA_00769		hypothetical protein	CDS	147				Protein of unknown function (DUF2740)	Protein of unknown function DUF2740
KODJJDOA_00770		replication protein	CDS	816	GO:0006260	DNA replication	BP	consensus disorder prediction~phage_O_Nterm: phage replication protein O, N-terminal domain~Bacteriophage replication protein O~consensus disorder prediction	Winged helix-like DNA-binding domain superfamily~Bacteriophage lambda, GpO, N-terminal~Bacteriophage lambda, GpO, N-terminal~NA
KODJJDOA_00771		DNA helicase	CDS	1377	GO:0003678_GO:0005524_GO:0006260	DNA helicase activity_ATP binding_DNA replication	MF_MF_BP	Superfamily 4 helicase domain profile.~DnaB-like helicase C terminal domain~DnaB_C~consensus disorder prediction~DnaB-like helicase N terminal domain~NA	DNA helicase DnaB, N-terminal/DNA primase DnaG, C-terminal~DNA helicase, DnaB-like, C-terminal~DNA helicase, DnaB-like, N-terminal domain superfamily~DNA helicase, DnaB-like, C-terminal~DNA helicase, DnaB-like, C-terminal~DNA helicase, DnaB-like, N-terminal~P-loop containing nucleoside triphosphate hydrolase
KODJJDOA_00772	ninB	recombination protein NinB	CDS	438				NinB protein	NinB superfamily~NinB superfamily~Recombinase NinB
KODJJDOA_00773		hypothetical protein	CDS	333				Protein of unknown function (DUF2591)	Bacteriophage P22, NinX
KODJJDOA_00774	ninF	protein ninF	CDS	177				NinF protein	NinF
KODJJDOA_00775	ninG_1	recombination protein NinG	CDS	612				consensus disorder prediction~Bacteriophage Lambda NinG protein~NA	Bacteriophage lambda NinG~NA
KODJJDOA_00776		hypothetical protein	CDS	225
KODJJDOA_00777		phage NinH family protein	CDS	204	GO:0003677	DNA binding	MF	Phage NinH protein~NA	Bacteriophage NinH~Homeobox-like domain superfamily~NA
KODJJDOA_00778		hypothetical protein	CDS	180				consensus disorder prediction~consensus disorder prediction
KODJJDOA_00779		antitermination protein	CDS	624	GO:0003677_GO:0006355	DNA binding_regulation of transcription, DNA-templated	MF_BP	Antitermination protein~Antitermination protein~consensus disorder prediction	Antitermination protein~Antitermination protein~Heat shock protein DnaJ, cysteine-rich domain superfamily~NA
KODJJDOA_00780		phage holin family protein	CDS	204				Bacteriophage holin family HP1	Bacteriophage holin HP1 family
KODJJDOA_00781		lysozyme	CDS	504	GO:0003796_GO:0009253_GO:0019076_GO:0019835_GO:0016998	lysozyme activity_peptidoglycan catabolic process_viral release from host cell_cytolysis_cell wall macromolecule catabolic process	MF_BP_BP_BP_BP	Endolysin.~endolysin_R21_like~SAR-endolysin.~Phage lysozyme	Endolysin T4 type~Lysozyme-like domain superfamily~Glycoside hydrolase, family 24
KODJJDOA_00782		hypothetical protein	CDS	186	GO:0019076_GO:0019835	viral release from host cell_cytolysis	BP_BP	Lipoprotein Rz1 precursor~Prokaryotic membrane lipoprotein lipid attachment site profile.	Spanin, outer membrane subunit~NA
KODJJDOA_00783		Rha family transcriptional regulator	CDS	687				Phage regulatory protein Rha (Phage_pRha)	Bacteriophage regulatory protein, Rha family
KODJJDOA_00784		hypothetical protein	CDS	243				Protein of unknown function (DUF2560)	Bacteriophage P22, Orf80
KODJJDOA_00785		hypothetical protein	CDS	180
KODJJDOA_00786		DNA-packaging protein	CDS	489				consensus disorder prediction~DNA-packaging protein gp3~NA	DNA-packaging protein gp3~NA
KODJJDOA_00787		terminase large subunit	CDS	1500				Terminase RNaseH-like domain~Terminase-like family	Terminase, large subunit gp17-like~Terminase large subunit, T4likevirus-type
KODJJDOA_00788		portal protein	CDS	2178				consensus disorder prediction~Phage P22-like portal protein~consensus disorder prediction	Phage P22-like portal protein~NA
KODJJDOA_00789		scaffold protein	CDS	912	GO:0005515	protein binding	MF	Bacteriophage, scaffolding protein~NA	Bacteriophage P22, Gp8, scaffold~Virus scaffolding protein, C-terminal
KODJJDOA_00790		coat protein	CDS	1293				P22 coat protein - gene protein 5~NA	Major capsid protein Gp5~NA
KODJJDOA_00791		hypothetical protein	CDS	210				consensus disorder prediction
KODJJDOA_00792		packaged DNA stabilization gp4 family protein	CDS	501				P22 tail accessory factor	Peptidoglycan hydrolase Gp4 superfamily~Tail accessory factor GP4
KODJJDOA_00793		packaged DNA stabilization protein gp10	CDS	1419				Phage stabilisation protein	Bacteriophage P22, Gp10, DNA-stabilising
KODJJDOA_00794		hypothetical protein	CDS	702
KODJJDOA_00795		hypothetical protein	CDS	456				Protein of unknown function (DUF2824)	Protein of unknown function DUF2824
KODJJDOA_00796		hypothetical protein	CDS	693
KODJJDOA_00797		phage DNA ejection protein	CDS	1296				DNA/protein translocase of phage P22 injectosome~consensus disorder prediction	DNA transfer protein~NA
KODJJDOA_00798		hypothetical protein	CDS	1998
KODJJDOA_00799		hypothetical protein	CDS	486				Prokaryotic membrane lipoprotein lipid attachment site profile.
KODJJDOA_00800		Arc family DNA-binding protein	CDS	255	GO:0003677_GO:0006355	DNA binding_regulation of transcription, DNA-templated	MF_BP	Arc-like DNA binding domain~NA	Arc-like DNA binding domain~Arc-type ribbon-helix-helix~Ribbon-helix-helix
KODJJDOA_00801		endorhamnosidase	CDS	2004	GO:0009405			Head binding~Salmonella phage P22 tail-spike	Bacteriophage P22 tailspike, N-terminal~Pectin lyase fold/virulence factor~P22 tailspike-like, C-terminal domain superfamily~Phage P22 tailspike-like, N-terminal domain superfamily~Phage P22 tailspike-like, N-terminal domain superfamily~P22 tailspike C-terminal domain
KODJJDOA_00802		glucosyltransferase domain-containing protein	CDS	1458				Glucosyl transferase GtrII	Glucosyl transferase II
KODJJDOA_00803		glycosyltransferase family 2 protein	CDS	933				DPM1_like_bac~Glycosyl transferase family 2	Nucleotide-diphospho-sugar transferases~Nucleotide-diphospho-sugar transferases~Glycosyltransferase 2-like
KODJJDOA_00804		GtrA family protein	CDS	363	GO:0000271_GO:0016021	polysaccharide biosynthetic process_integral component of membrane	BP_CC	GtrA-like protein~NA	GtrA-like protein~Glucose translocase, bactoprenol-linked
KODJJDOA_01872	ecnB	lipoprotein toxin entericidin B	CDS	147	GO:0009636_GO:0016020	response to toxic substance_membrane	BP_CC	Prokaryotic membrane lipoprotein lipid attachment site profile.~Entericidin EcnA/B family	Entericidin A/B
KODJJDOA_02011		hypothetical protein	CDS	210
KODJJDOA_02849		hypothetical protein	CDS	483				consensus disorder prediction~Protein of unknown function (DUF2514)~Prokaryotic membrane lipoprotein lipid attachment site profile.	Protein of unknown function DUF2514~NA
KODJJDOA_02850		hypothetical protein	CDS	630	GO:0004568_GO:0006032_GO:0016998	chitinase activity_chitin catabolic process_cell wall macromolecule catabolic process	MF_BP_BP	chitinase_GH19~Chitinase class I	Lysozyme-like domain superfamily~Glycoside hydrolase, family 19, catalytic
KODJJDOA_02851		hypothetical protein	CDS	309				Putative 3TM holin, Phage_holin_3	Putative 3TM holin, Phage holin 3
KODJJDOA_02852		hypothetical protein	CDS	405				Putative phage holin	Putative phage holin-like
KODJJDOA_02853		hypothetical protein	CDS	276	GO:0000271_GO:0016021	polysaccharide biosynthetic process_integral component of membrane	BP_CC	GtrA-like protein	GtrA-like protein
KODJJDOA_02854		hypothetical protein	CDS	1923	GO:0016747	acyltransferase activity, transferring groups other than amino-acyl groups	MF	Acyltransferase family~NA	Acyltransferase 3~NA
KODJJDOA_02855		hypothetical protein	CDS	2310				Salmonella phage P22 tail-spike~NA	Pectin lyase fold/virulence factor~P22 tailspike C-terminal domain~P22 tailspike-like, C-terminal domain superfamily
KODJJDOA_02856		hypothetical protein	CDS	261
KODJJDOA_02857		hypothetical protein	CDS	141
KODJJDOA_02858		hypothetical protein	CDS	2475
KODJJDOA_02859		hypothetical protein	CDS	1803
KODJJDOA_02860		hypothetical protein	CDS	2814
KODJJDOA_02861		hypothetical protein	CDS	543				consensus disorder prediction
KODJJDOA_02862		hypothetical protein	CDS	465					Acyl-CoA N-acyltransferase
KODJJDOA_02863		hypothetical protein	CDS	2478
KODJJDOA_02864		hypothetical protein	CDS	606				consensus disorder prediction
KODJJDOA_02865		hypothetical protein	CDS	336				consensus disorder prediction
KODJJDOA_02866		hypothetical protein	CDS	285
KODJJDOA_02867		hypothetical protein	CDS	393
KODJJDOA_02868		hypothetical protein	CDS	1008
KODJJDOA_02869		hypothetical protein	CDS	717				consensus disorder prediction~consensus disorder prediction~consensus disorder prediction
KODJJDOA_02870		hypothetical protein	CDS	297
KODJJDOA_02871		hypothetical protein	CDS	1671				consensus disorder prediction~consensus disorder prediction~Bacteriophage head to tail connecting protein	Head-to-tail connector protein, podovirus-type
KODJJDOA_02872		hypothetical protein	CDS	207				consensus disorder prediction~consensus disorder prediction~consensus disorder prediction
KODJJDOA_02874		hypothetical protein	CDS	195
KODJJDOA_02875		hypothetical protein	CDS	1482
KODJJDOA_02876		hypothetical protein	CDS	594	GO:0006323	DNA packaging	BP	Terminase small subunit~NA	Terminase small subunit~Terminase small subunit, N-terminal domain superfamily
KODJJDOA_02877		hypothetical protein	CDS	267					ParB/Sulfiredoxin superfamily
KODJJDOA_02878		hypothetical protein	CDS	258				Domain of unknown function (DUF4752)	Protein of unknown function DUF4752
KODJJDOA_02879		hypothetical protein	CDS	639
KODJJDOA_02880		hypothetical protein	CDS	480
KODJJDOA_02881		hypothetical protein	CDS	345	GO:0003677_GO:0004536	DNA binding_deoxyribonuclease activity	MF_MF	Protein of unknown function (DUF1064)	T7 endonuclease I-like~Protein of unknown function DUF1064
KODJJDOA_02882	dnaT_2	Primosomal protein 1	CDS	816				consensus disorder prediction~consensus disorder prediction~DnaT DNA-binding domain~consensus disorder prediction~consensus disorder prediction~NA	DnaT, DNA-binding domain~NA
KODJJDOA_02883		hypothetical protein	CDS	204
KODJJDOA_02884		hypothetical protein	CDS	234
KODJJDOA_02885		hypothetical protein	CDS	597	GO:0003677	DNA binding	MF	HTH_XRE~Helix-turn-helix	Cro/C1-type helix-turn-helix domain~Lambda repressor-like, DNA-binding domain superfamily~Lambda repressor-like, DNA-binding domain superfamily~Cro/C1-type helix-turn-helix domain
KODJJDOA_02886		hypothetical protein	CDS	150
KODJJDOA_02887		hypothetical protein	CDS	303
KODJJDOA_02888	recE	Exodeoxyribonuclease 8	CDS	825				PDDEXK-like domain of unknown function (DUF3799)	Putative exodeoxyribonuclease 8, PDDEXK-like domain
KODJJDOA_02889		hypothetical protein	CDS	111
KODJJDOA_02890		hypothetical protein	CDS	882	GO:0003677_GO:0006259	DNA binding_DNA metabolic process	MF_BP	consensus disorder prediction~consensus disorder prediction~RecT family	RecT family
KODJJDOA_02891		hypothetical protein	CDS	249				consensus disorder prediction~consensus disorder prediction~Prophage CP4-57 regulatory protein (AlpA)	DNA-binding transcriptional activator AlpA
KODJJDOA_02892		hypothetical protein	CDS	117
KODJJDOA_02893		hypothetical protein	CDS	300				PerC transcriptional activator	Transcriptional activator PerC/bacteriophage SfV Orf40
KODJJDOA_02894		hypothetical protein	CDS	1068				dndB_like~DNA-sulfur modification-associated~DGQHR: DGQHR domain	DNA sulphur modification protein DndB~DGQHR-containing domain
KODJJDOA_02895		hypothetical protein	CDS	594	GO:0003676_GO:0008168_GO:0032259	nucleic acid binding_methyltransferase activity_methylation	MF_MF_BP	N-6 Adenine-specific DNA methylases signature.~MT-A70-like family profile.~MT-A70	DNA methylase, N-6 adenine-specific, conserved site~MT-A70-like~S-adenosyl-L-methionine-dependent methyltransferase~MT-A70-like
KODJJDOA_02896		hypothetical protein	CDS	180
KODJJDOA_02897		tyrosine-type recombinase/integrase	CDS	1254	GO:0003677_GO:0006310_GO:0015074	DNA binding_DNA recombination_DNA integration	MF_BP_BP	INT_P4_C~Tyrosine recombinase domain profile.~Phage integrase family~Arm DNA-binding domain~Phage integrase, N-terminal SAM-like domain	Integrase/recombinase, N-terminal~Integrase-like, catalytic domain superfamily~Integrase, catalytic domain~Integrase, DNA-binding domain superfamily~Integrase, DNA-binding domain~DNA breaking-rejoining enzyme, catalytic core~Integrase, SAM-like, N-terminal
KODJJDOA_04317		YlcG family protein	CDS	147
KODJJDOA_04437		hypothetical protein	CDS	435
KODJJDOA_04438		hypothetical protein	CDS	267
KODJJDOA_04439		Rpn family recombination-promoting nuclease/putative transposase	CDS	915				Putative transposase, YhgA-like~T_den_put_tspse: conserved hypothetical protein	Transposase (putative), YhgA-like~Recombination-promoting nuclease RpnA
KODJJDOA_04440		hypothetical protein	CDS	159
KODJJDOA_04441		helix-turn-helix transcriptional regulator	CDS	252	GO:0003677	DNA binding	MF	HTH_XRE~NA	Lambda repressor-like, DNA-binding domain superfamily~Lambda repressor-like, DNA-binding domain superfamily~Cro/C1-type helix-turn-helix domain~NA
KODJJDOA_04442		hypothetical protein	CDS	849				Domain of unknown function (DUF4942)	Domain of unknown function DUF4942
KODJJDOA_04443		hypothetical protein	CDS	336				consensus disorder prediction~consensus disorder prediction
KODJJDOA_04444	nikA	IncI1-type relaxosome accessory protein NikA	CDS	132
KODJJDOA_04445	nikB	IncI1-type relaxase NikB	CDS	2700				consensus disorder prediction~Relaxase/Mobilisation nuclease domain	Endonuclease relaxase, MobA/VirD2
KODJJDOA_04446		hypothetical protein	CDS	2292				consensus disorder prediction~NA	P-loop containing nucleoside triphosphate hydrolase~NA
KODJJDOA_04447	trbB	IncI1-type conjugal transfer protein TrbB	CDS	1071				DsbA_DsbC_DsbG~Thioredoxin-like domain~NA	Disulphide bond isomerase, DsbC/G~Thioredoxin-like fold~Thioredoxin-like superfamily~Thioredoxin-like superfamily
KODJJDOA_04448	trbA	IncI1-type conjugal transfer protein TrbA	CDS	1209
KODJJDOA_04449		hypothetical protein	CDS	909
KODJJDOA_04450		hypothetical protein	CDS	177
KODJJDOA_04451		HEAT repeat domain-containing protein	CDS	210				HEAT repeats~NA	Armadillo-like helical~Armadillo-type fold
KODJJDOA_04452	excA	plasmid IncI1-type surface exclusion protein ExcA	CDS	651
KODJJDOA_04453		DotA/TraY family protein	CDS	2169				DotA_TraY: conjugal transfer/type IV secretion protein DotA/TraY	Conjugal transfer/type IV secretion protein DotA/TraY
KODJJDOA_04454	traX	IncI1-type conjugal transfer protein TraX	CDS	585
KODJJDOA_04455	traW	IncI1-type conjugal transfer protein TraW	CDS	1203
KODJJDOA_04456	traV	IncI1-type conjugal transfer protein TraV	CDS	615
KODJJDOA_04457	traU	IncI1-type conjugal transfer protein TraU	CDS	3045					P-loop containing nucleoside triphosphate hydrolase~NA
KODJJDOA_04458	traT	IncI1-type conjugal transfer protein TraT	CDS	801
KODJJDOA_04459	traS	putative conjugal transfer protein TraS	CDS	189
KODJJDOA_04460	traR_2	IncI1-type conjugal transfer protein TraR	CDS	405				Prokaryotic membrane lipoprotein lipid attachment site profile.
KODJJDOA_04461	traQ	conjugal transfer protein TraQ	CDS	528
KODJJDOA_04462	traP	IncI1-type conjugal transfer protein TraP	CDS	705				consensus disorder prediction~consensus disorder prediction
KODJJDOA_04463	traO	conjugal transfer protein TraO	CDS	1290				IcmE~consensus disorder prediction~consensus disorder prediction~consensus disorder prediction
KODJJDOA_04464	traN_1	IncI1-type conjugal transfer protein TraN	CDS	984				consensus disorder prediction~Putative outer membrane core complex of type IVb secretion~consensus disorder prediction	Putative outer membrane core complex of type IVb secretion~NA
KODJJDOA_04465		DotI/IcmL family type IV secretion protein	CDS	693				IcmL~Type-IV b secretion system, inner-membrane complex component	Type-IV b secretion system, inner-membrane complex component~Type-IV b secretion system, inner-membrane complex component
KODJJDOA_04466		conjugal transfer protein	CDS	348
KODJJDOA_04467		DNA primase	CDS	3768				consensus disorder prediction~consensus disorder prediction~consensus disorder prediction~TOPRIM_primases~consensus disorder prediction~consensus disorder prediction~consensus disorder prediction~Large polyvalent protein-associated domain 7~consensus disorder prediction~consensus disorder prediction~consensus disorder prediction~consensus disorder prediction~NA	Archaeal primase DnaG/twinkle, TOPRIM domain~Large polyvalent protein-associated domain 7~TOPRIM domain
KODJJDOA_04468		phospholipase D family protein	CDS	552	GO:0003824	catalytic activity	MF	Phospholipase D phosphodiesterase active site profile.~PLDc_Nuc~PLD-like domain	Phospholipase D/Transphosphatidylase~Phospholipase D-like domain
KODJJDOA_04469		hypothetical protein	CDS	291
KODJJDOA_04470	traJ	plasmid transfer ATPase TraJ	CDS	1149				plasmid_TraJ: plasmid transfer ATPase TraJ~Type II/IV secretion system protein~NA	ATPase, plasmid transfer, TraJ~Type II/IV secretion system protein~P-loop containing nucleoside triphosphate hydrolase
KODJJDOA_04471	traI	IncI1-type conjugal transfer lipoprotein TraI	CDS	819				Prokaryotic membrane lipoprotein lipid attachment site profile.~Type IV secretory system, conjugal DNA-protein transfer	Putative type IV secretory system protein
KODJJDOA_04472	traH	IncI1-type conjugal transfer lipoprotein TraH	CDS	459				Prokaryotic membrane lipoprotein lipid attachment site profile.~DotD protein	DotD superfamily~DotD protein
KODJJDOA_04473		histidine phosphatase family protein	CDS	585	GO:0016791	phosphatase activity	MF	HP~Histidine phosphatase superfamily (branch 1)	Histidine phosphatase superfamily~Lipopolysaccharide core heptose(II)-phosphate phosphatase~Histidine phosphatase superfamily~Histidine phosphatase superfamily, clade-1
KODJJDOA_04474	traF_2	conjugal transfer protein TraF	CDS	1203				F plasmid transfer operon, TraF, protein	Putative conjugal transfer protein TraF-related
KODJJDOA_04475		hypothetical protein	CDS	825
KODJJDOA_04476	pilV	shufflon system plasmid conjugative transfer pilus tip adhesin PilV	CDS	1293				Bacterial shufflon protein, N-terminal constant region	Enolase-like, N-terminal~Bacterial shufflon protein, N-terminal
KODJJDOA_04477		prepilin peptidase	CDS	657	GO:0004190_GO:0016020	aspartic-type endopeptidase activity_membrane	MF_CC	Type IV leader peptidase family	Prepilin type IV endopeptidase, peptidase domain
KODJJDOA_04478		lytic transglycosylase domain-containing protein	CDS	561				Transglycosylase SLT domain~LT_IagB_like~NA	Transglycosylase SLT domain 1~Lysozyme-like domain superfamily~NA
KODJJDOA_04479	pilX	pilus assembly protein PilX	CDS	615				PilS N terminal~NA	Type 4 secretion system, PilS, N-terminal~NA
KODJJDOA_04480		type II secretion system F family protein	CDS	1086				Type II secretion system (T2SS), protein F~Type II secretion system (T2SS), protein F~NA	Type II secretion system GspF domain superfamily~Type II secretion system protein GspF domain~Type II secretion system protein GspF domain~Type II secretion system GspF domain superfamily
KODJJDOA_04481	tadA_2	Flp pilus assembly complex ATPase component TadA	CDS	1554				Type II/IV secretion system protein~NA	Type II/IV secretion system protein~P-loop containing nucleoside triphosphate hydrolase
KODJJDOA_04482	pilP	type IV pilus biogenesis protein PilP	CDS	453				pilP_fam: type IV pilus biogenesis protein PilP~NA	Type IV pilus biogenesis PilP~NA
KODJJDOA_04483	pilO2	type 4b pilus protein PilO2	CDS	1296				Pilin accessory protein (PilO)	Pilin accessory predicted
KODJJDOA_04484		PilN family type IVB pilus formation outer membrane protein	CDS	1683	GO:0009306_GO:0009297_GO:0019867	protein secretion_pilus assembly_outer membrane	BP_BP_CC	pilus_B_mal_scr: type IVB pilus formation outer membrane protein, R64 PilN family~consensus disorder prediction~Bacterial type II and III secretion system protein~Secretin N-terminal domain~Prokaryotic membrane lipoprotein lipid attachment site profile.	Pilus formation type IVB, outer membrane PilN~Type II/III secretion system~Secretin, N-terminal~NA
KODJJDOA_04485	pilM	type IV pilus biogenesis protein PilM	CDS	438				PilM	PilM, inner membrane
KODJJDOA_04486	pilL	type IV pilus biogenesis lipoprotein PilL	CDS	1068				consensus disorder prediction~Prokaryotic membrane lipoprotein lipid attachment site profile.~consensus disorder prediction~consensus disorder prediction~Toxin co-regulated pilus biosynthesis protein Q~consensus disorder prediction	Toxin co-regulated pilus biosynthesis protein Q, C-terminal~NA
KODJJDOA_04487		hypothetical protein	CDS	594
KODJJDOA_04488		hypothetical protein	CDS	261
KODJJDOA_04489		hypothetical protein	CDS	261
KODJJDOA_04490		PilI type IV pilus biogenesis protein	CDS	255				Plasmid conjugative transfer protein PilI	Plasmid conjugative transfer protein PilI
KODJJDOA_04491	traC_2	conjugal transfer protein TraC	CDS	684
KODJJDOA_04492	nusG_2	transcription termination factor NusG	CDS	534	GO:0006355	regulation of transcription, DNA-templated	BP	Transcription termination factor nusG~NA	NusG, N-terminal~NusG, N-terminal domain superfamily~NusG, N-terminal domain superfamily~NusG, N-terminal
KODJJDOA_04493	traA	conjugal transfer protein TraA	CDS	288	GO:0006355_GO:0003677	regulation of transcription, DNA-templated_DNA binding	BP_MF		Winged helix-like DNA-binding domain superfamily~Transcription regulator LuxR, C-terminal~Signal transduction response regulator, C-terminal effector
KODJJDOA_04494		replication initiation protein	CDS	1077	GO:0006276	plasmid maintenance	BP	consensus disorder prediction~IncFII RepA protein family	Plasmid replication initiation, RepA
KODJJDOA_04495		hypothetical protein	CDS	993
KODJJDOA_04496		hypothetical protein	CDS	618				ProQ/FINO family~consensus disorder prediction~consensus disorder prediction~NA	ProQ/FinO domain~ProQ/FinO domain superfamily~ProQ/FinO domain~ProQ/FinO domain superfamily
KODJJDOA_04497		hypothetical protein	CDS	1557	GO:0005524	ATP binding	MF	AAA domain, putative AbiEii toxin, Type IV TA system~AAA domain	ATPase, AAA-type, core~AAA+ ATPase domain~P-loop containing nucleoside triphosphate hydrolase~Rad50/SbcC-type AAA domain
KODJJDOA_04498		hypothetical protein	CDS	591
KODJJDOA_04499		hypothetical protein	CDS	258
KODJJDOA_04500		hypothetical protein	CDS	1122				Protein of unknown function (DUF3800)	Protein of unknown function DUF3800
KODJJDOA_04501		hypothetical protein	CDS	492
KODJJDOA_04502		hypothetical protein	CDS	351
KODJJDOA_04503		hypothetical protein	CDS	822
KODJJDOA_04504		phage integrase family protein	CDS	780	GO:0003677_GO:0006310_GO:0015074	DNA binding_DNA recombination_DNA integration	MF_BP_BP	DNA_BRE_C~Tyrosine recombinase domain profile.~Phage integrase family~NA	Resolvase, Rsv~DNA breaking-rejoining enzyme, catalytic core~Integrase, catalytic domain~Integrase-like, catalytic domain superfamily
KODJJDOA_04505		ParA family protein	CDS	645				ATPase MipZ~ParAB_family~NA	ATPase MipZ~P-loop containing nucleoside triphosphate hydrolase~NA
KODJJDOA_04506		hypothetical protein	CDS	309				consensus disorder prediction~consensus disorder prediction
KODJJDOA_04507	parM	plasmid segregation protein ParM	CDS	981				ParM_like~StbA protein~NA	ParM-like~ATPase, nucleotide binding domain~Plasmid segregation protein ParM/StbA~ATPase, nucleotide binding domain
KODJJDOA_04508		plasmid partitioning/stability family protein	CDS	417				consensus disorder prediction~Plasmid stability protein~consensus disorder prediction~consensus disorder prediction~NA	Plasmid stability protein, StbB~StbB superfamily
KODJJDOA_04509		Y-family DNA polymerase	CDS	1275	GO:0006281_GO:0003684	DNA repair_damaged DNA binding	BP_MF	impB/mucB/samB family~Domain of unknown function (DUF4113)~UmuC domain profile.~impB/mucB/samB family C-terminal domain~IMS family HHH motif~PolY_Pol_V_umuC	UmuC domain~DNA polymerase, Y-family, little finger domain superfamily~DNA polymerase, Y-family, little finger domain superfamily~Domain of unknown function DUF4113~UmuC domain~DNA polymerase, Y-family, little finger domain~Reverse transcriptase/Diguanylate cyclase domain~DNA polymerase type-Y, HhH motif~DNA/RNA polymerase superfamily~NA
KODJJDOA_04510	umuD_2	translesion error-prone DNA polymerase V autoproteolytic subunit	CDS	438	GO:0003677_GO:0006355	DNA binding_regulation of transcription, DNA-templated	MF_BP	Repressor LexA serine protease (S24) family signature~Repressor LexA serine protease (S24) family signature~Repressor LexA serine protease (S24) family signature~Peptidase S24-like~S24_LexA-like~NA	Peptidase S24, LexA-like~Peptidase S24, LexA-like~Peptidase S24, LexA-like~Peptidase S24/S26A/S26B/S26C~LexA-like~LexA/Signal peptidase-like superfamily
KODJJDOA_04511		DinI-like family protein	CDS	249				DinI-like family~NA	DNA damage-inducible protein DinI-like~DinI-like superfamily~DinI-like superfamily
KODJJDOA_04512		hypothetical protein	CDS	927				Ferredoxin-like domain in Api92-like protein~Protein of unknown function (DUF1281)~NA	Api92-like domain superfamily~YubB, ferredoxin-like domain~Protein of unknown function DUF1281~NA
KODJJDOA_04513		DNA methylase	CDS	684	GO:0003677_GO:0006306_GO:0008170_GO:0003676_GO:0008168_GO:0032259	DNA binding_DNA methylation_N-methyltransferase activity_nucleic acid binding_methyltransferase activity_methylation	MF_BP_MF_MF_MF_BP	S21 class N4 adenine-specific DNA methyltransferase signature~S21 class N4 adenine-specific DNA methyltransferase signature~S21 class N4 adenine-specific DNA methyltransferase signature~S21 class N4 adenine-specific DNA methyltransferase signature~S21 class N4 adenine-specific DNA methyltransferase signature~DNA methylase~DNA methylase~N-6 Adenine-specific DNA methylases signature.~NA	Restriction/modification DNA-methylase~Restriction/modification DNA-methylase~Restriction/modification DNA-methylase~Restriction/modification DNA-methylase~Restriction/modification DNA-methylase~DNA methylase N-4/N-6~DNA methylase N-4/N-6~DNA methylase, N-6 adenine-specific, conserved site~S-adenosyl-L-methionine-dependent methyltransferase
KODJJDOA_04514		hypothetical protein	CDS	222
KODJJDOA_04515		hypothetical protein	CDS	435				Protein of unknown function (DUF1380)	Protein of unknown function DUF1380
KODJJDOA_04516		hypothetical protein	CDS	822
KODJJDOA_04517		antirestriction protein	CDS	426				Antirestriction protein~NA	Antirestriction protein~Antirestriction domain superfamily
KODJJDOA_04518		hypothetical protein	CDS	423				Protein of unknown function (DUF1380)	Protein of unknown function DUF1380
KODJJDOA_04519		hypothetical protein	CDS	192
KODJJDOA_04520		single-stranded DNA-binding protein	CDS	528	GO:0003697_GO:0006260	single-stranded DNA binding_DNA replication	MF_BP	consensus disorder prediction~Single-stranded DNA-binding protein.~consensus disorder prediction~SSB_OBF~ssb: single-stranded DNA-binding protein~Single-strand binding protein family~Single-strand binding (SSB) domain profile.	Single-stranded DNA-binding protein~Primosome PriB/single-strand DNA-binding~Single-stranded DNA-binding protein~Primosome PriB/single-strand DNA-binding~Nucleic acid-binding, OB-fold~Primosome PriB/single-strand DNA-binding
KODJJDOA_04521		hypothetical protein	CDS	234				Bacterial protein of unknown function (DUF905)~NA	YkfF-like domain superfamily~Protein of unknown function DUF905~NA
KODJJDOA_04522		ParB/RepB/Spo0J family partition protein	CDS	2049	GO:0003677	DNA binding	MF	parB_part: ParB/RepB/Spo0J family partition protein~ParB_N_like~ParB-like nuclease domain~NA	ParB/Sulfiredoxin superfamily~ParB/Sulfiredoxin~ParB/RepB/Spo0J partition protein~ParB/Sulfiredoxin~NA
KODJJDOA_04523	psiB	conjugation system SOS inhibitor PsiB	CDS	435				Plasmid SOS inhibition protein (PsiB)	Protein PsiB-like superfamily~Protein PsiB
KODJJDOA_04524		plasmid SOS inhibition protein A	CDS	720				PsiA protein~consensus disorder prediction	Uncharacterised protein family PsiA~NA
KODJJDOA_04525		hypothetical protein	CDS	597
KODJJDOA_04526		hypothetical protein	CDS	222				consensus disorder prediction~consensus disorder prediction
KODJJDOA_04527	ardA	antirestriction protein ArdA	CDS	501				Antirestriction protein (ArdA)~NA	Antirestriction~Antirestriction protein ArdA, domain 3
KODJJDOA_04668		hypothetical protein	CDS	1350				consensus disorder prediction~consensus disorder prediction~Toprim domain~TOPRIM_primases	TOPRIM domain~Archaeal primase DnaG/twinkle, TOPRIM domain
KODJJDOA_04920		LysR family transcriptional regulator	CDS	126	GO:0003700_GO:0006355	DNA-binding transcription factor activity_regulation of transcription, DNA-templated	MF_BP	Bacterial regulatory helix-turn-helix protein, lysR family~LysR-type HTH domain profile.~NA	Transcription regulator HTH, LysR~Transcription regulator HTH, LysR~Winged helix-like DNA-binding domain superfamily~Winged helix DNA-binding domain superfamily
a If multiple locus tags annotate to the same gene, this is indicated by "_1", "_2", etc.

## Sheet: Unique to SX 245 Genome
ID Information		Prokka Annotation			InterProScan Functional Predictions
SX245 Locus Tag	Genea	Product	Feature Type	Length (bp)	GO ID	GO Term	GO Ontology	Signature Descriptions	InterPro Annotation Descriptions
FEFFHCGE_00350		peptidoglycan DD-metalloendopeptidase family protein	CDS	357				consensus disorder prediction~LysM~LysM domain~consensus disorder prediction~Prokaryotic membrane lipoprotein lipid attachment site profile.~LysM domain profile.~NA	LysM domain superfamily~LysM domain~LysM domain~LysM domain~LysM domain~NA
FEFFHCGE_00778		hypothetical protein	CDS	114
FEFFHCGE_01151		hypothetical protein	CDS	246
FEFFHCGE_01259		hypothetical protein	CDS	114
FEFFHCGE_03235	ydiV_2	Anti-FlhC(2)FlhD(4) factor YdiV	CDS	174
FEFFHCGE_04068		hypothetical protein	CDS	129
FEFFHCGE_04742		hypothetical protein	CDS	207				MFS_MdfA_MDR_like
FEFFHCGE_04761		Pentapeptide repeat protein	CDS	222				Pentapeptide repeats (8 copies)~NA	Pentapeptide repeat~NA
a If multiple locus tags annotate to the same gene, this is indicated by "_1", "_2", etc.
